# Supplementary material for: Orally Administered Natural Lipid Nanoparticle-Loaded 6-Shogaol Shapes the Anti-Inflammatory Microbiota and Metabolome
Source: Pharmaceutics. 2021 Aug 28;13(9):1355. doi: 10.3390/pharmaceutics13091355 (PMC8472296; doi:10.3390/pharmaceutics13091355)
Supplement: Supplementary file 1 [file pharmaceutics-13-01355-s001.zip › pharmaceutics-1315912-supplementary-r3.pdf]

# Supplementary Information: Orally administered natural lipid nanoparticle-loaded 6-shogaol shapes the anti-inflammatory microbiota and metabolome

Chunhua Yang, Dingpei Long, Junsik Sung, Zahra Alghoul and Didier Merlin

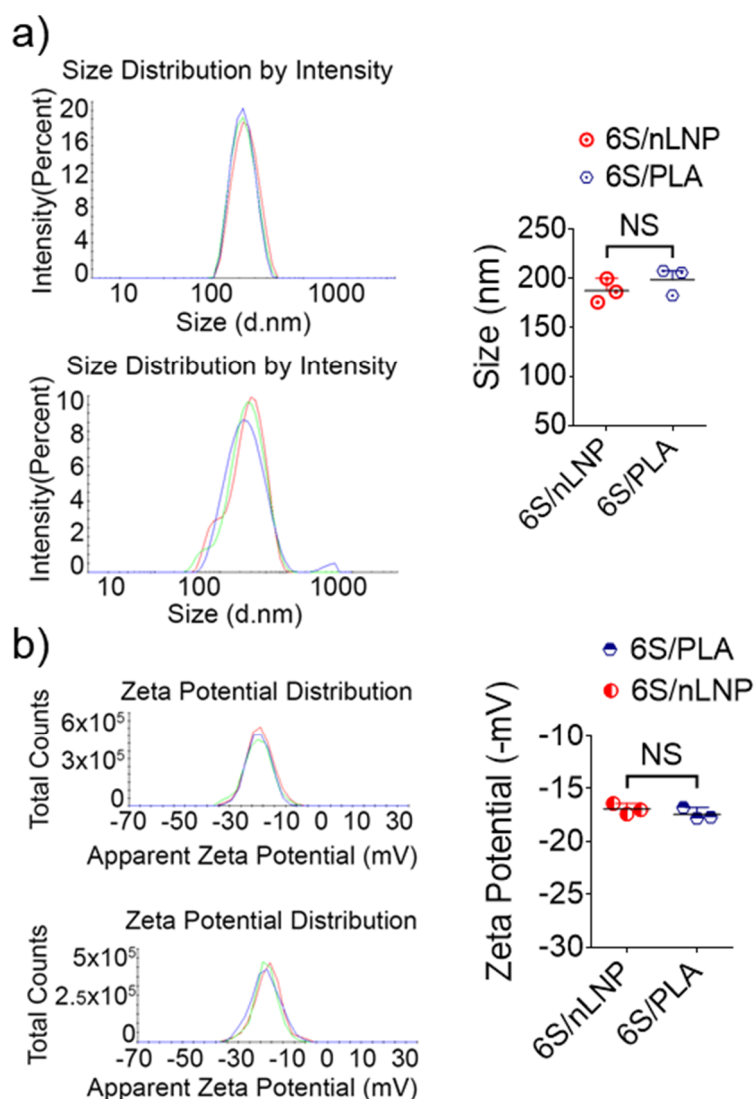

**Figure S1.** Size and zeta potential characterization of reassembled 6-shogaol loaded natural lipid nanoparticle (6S/nLNP) and 6-shogaol loaded PLA nanoparticles (6S/PLA). (a) Hydrated particle size distribution of 6S/nLNP (upper-left) and 6S/PLA (lower-left), and size comparison of 6S/nLNP versus 6S/PLA (right). (b) Zeta potential distribution of 6S/nLNP (upper-left) and 6S/PLA (lower-left), and zeta potential comparison of 6S/nLNP versus 6S/PLA (right).

a)

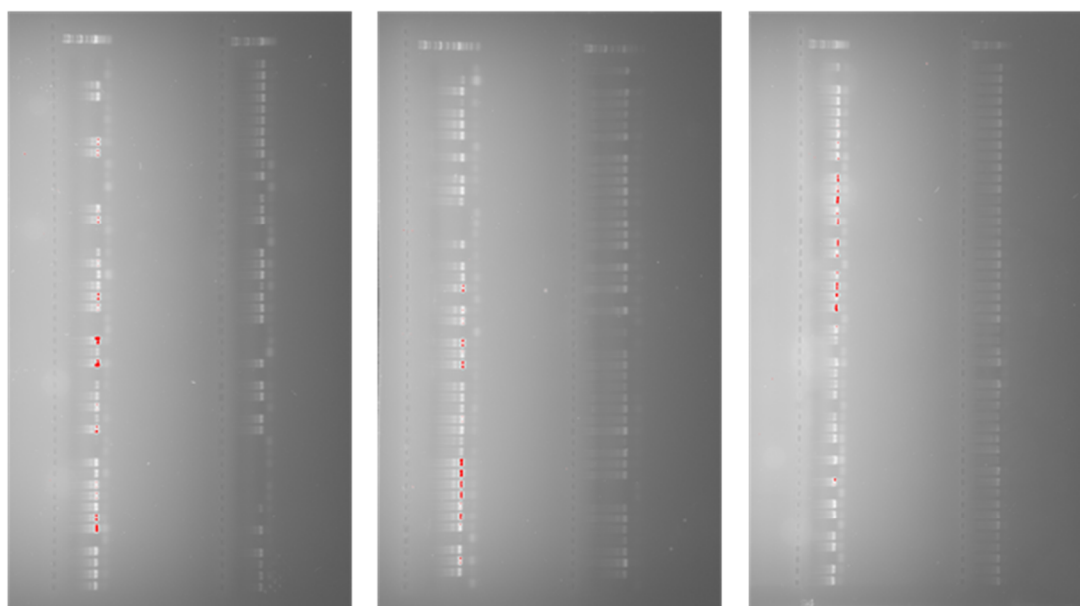

b)

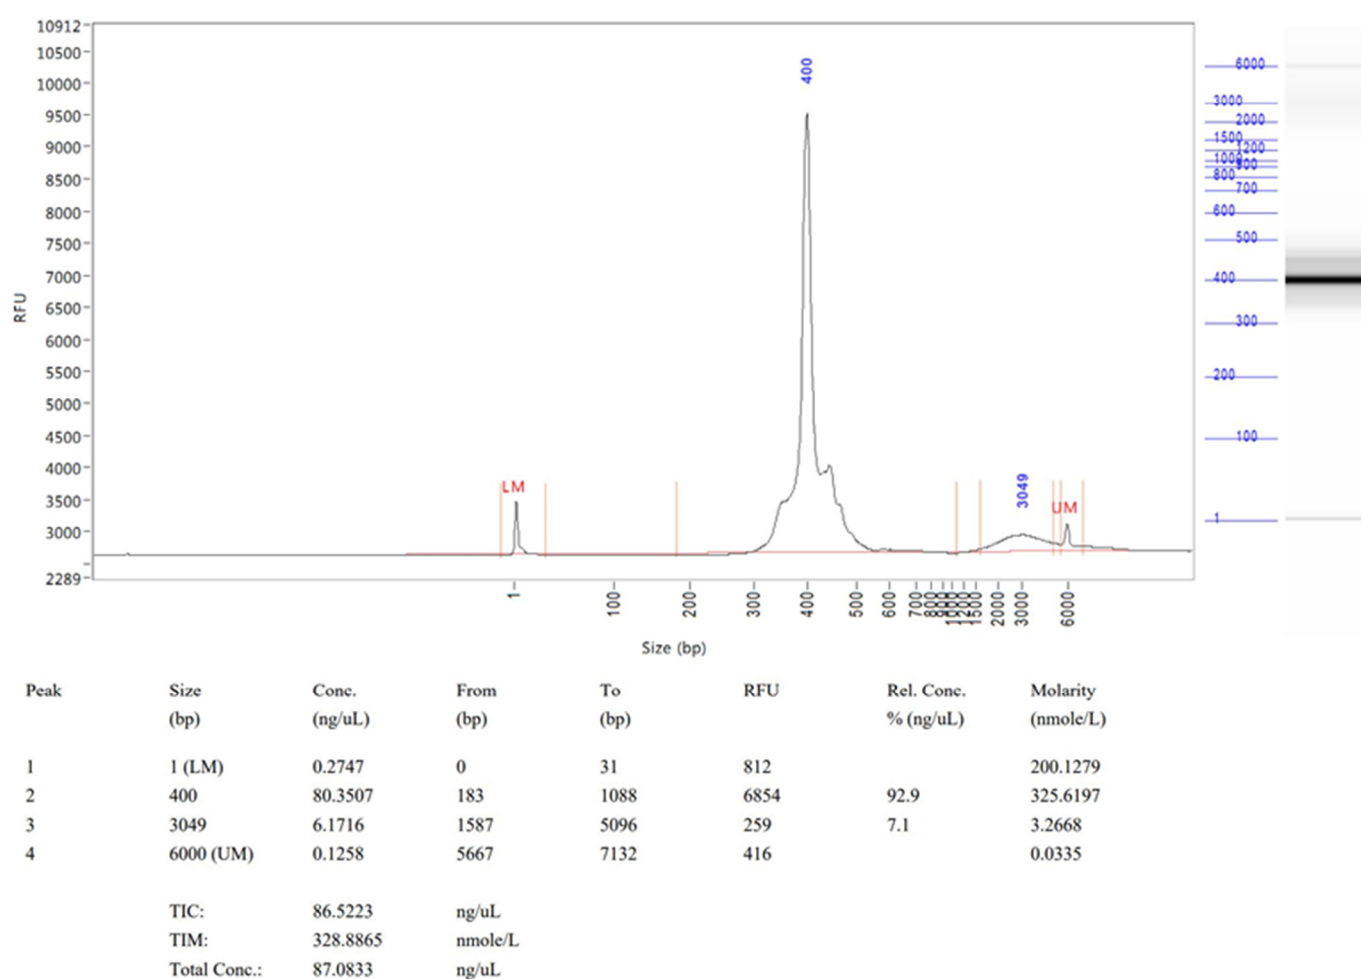

**Figure S2.** Quality control (QC) of sample preparation for 16S rRNA sequencing. (a) Gel electrophoresis of RNA samples extracted from different groups of mouse feces, and (b) the quality analysis of final pooled RNA before 16S rRNA sequencing.

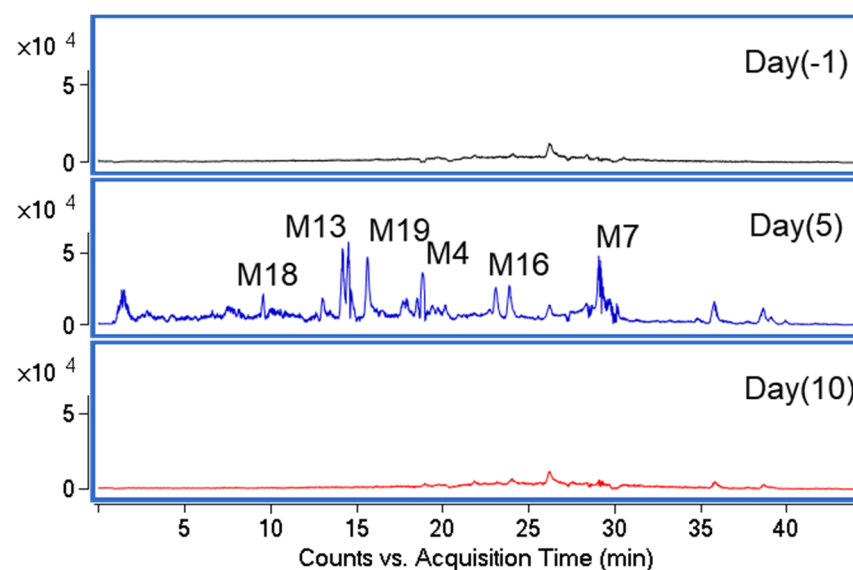

**Figure S3.** Extracted ion chromatogram (EIC, ESI+) LC-MS profiles of metabolites extracted from the different time points of 6S/nLNP treated mouse feces.

Metabolite profiles were extracted (by EIC or extracted ion chromatogram) from the total ion current chromatogram by utilizing an accurate molecular weight mass features extraction method. Metabolites used for accurate mass extraction were listed below (**Table S1**), and the mass error window was set at  $\pm 5$  ppm.

**Table S1.** Metabolites originated from 6-shogaol.

| Compound | Formula                                                         | [M+H] <sup>+</sup> | Compound | Formula                                                         | [M+H] <sup>+</sup> |
|----------|-----------------------------------------------------------------|--------------------|----------|-----------------------------------------------------------------|--------------------|
| 6S       | C <sub>17</sub> H <sub>24</sub> O <sub>3</sub>                  | 277.1798           | M11      | C <sub>17</sub> H <sub>26</sub> O <sub>3</sub>                  | 279.1955           |
| M1       | C <sub>20</sub> H <sub>33</sub> NO <sub>5</sub> S               | 400.2152           | M12      | C <sub>18</sub> H <sub>28</sub> O <sub>3</sub> S                | 325.1832           |
| M2       | C <sub>20</sub> H <sub>31</sub> NO <sub>5</sub> S               | 398.1996           | M13      | C <sub>27</sub> H <sub>41</sub> N <sub>3</sub> O <sub>9</sub> S | 584.2636           |
| M3       | C <sub>23</sub> H <sub>35</sub> N <sub>2</sub> O <sub>6</sub> S | 468.2289           | M14      | C <sub>17</sub> H <sub>22</sub> O <sub>3</sub>                  | 275.1642           |
| M4       | C <sub>22</sub> H <sub>35</sub> NO <sub>6</sub> S               | 442.2258           | M15      | C <sub>17</sub> H <sub>24</sub> O <sub>3</sub>                  | 277.1798           |
| M5       | C <sub>22</sub> H <sub>33</sub> NO <sub>6</sub> S               | 440.2101           | M16      | C <sub>21</sub> H <sub>31</sub> NO <sub>6</sub> S               | 426.1945           |
| M6       | C <sub>17</sub> H <sub>26</sub> O <sub>3</sub>                  | 279.1955           | M17      | C <sub>18</sub> H <sub>26</sub> O <sub>4</sub> S                | 339.1625           |
| M7       | C <sub>18</sub> H <sub>28</sub> O <sub>4</sub>                  | 309.2060           | M18      | C <sub>17</sub> H <sub>24</sub> O <sub>4</sub> S                | 325.1468           |
| M8       | C <sub>16</sub> H <sub>24</sub> O <sub>3</sub>                  | 265.1798           | M19      | C <sub>21</sub> H <sub>33</sub> NO <sub>6</sub> S               | 428.2101           |
| M9       | C <sub>17</sub> H <sub>28</sub> O <sub>3</sub>                  | 281.2111           | M20      | C <sub>18</sub> H <sub>28</sub> O <sub>4</sub> S                | 341.1781           |
| M10      | C <sub>18</sub> H <sub>26</sub> O <sub>3</sub> S                | 323.1675           | M21      | C <sub>17</sub> H <sub>26</sub> O <sub>4</sub> S                | 327.1625           |
